# Supplementary material
Source: MDPI journal article supplement (https://www.mdpi.com/2076-3417/14/9/3755)
Supplement: s1 [file s1]

**Supplementary information for the article entitled Exploring the Therapeutic Potential of Spilanthol from *Acmella paniculata* (Wall ex DC.) R. K. Jansen in Attenuating Neurodegenerative Diseases: A Multi-Faceted Approach Integrating *In-Silico* and *In-Vitro* Methodologies**

**Sanith Sri Jayashan <sup>1,2</sup>, Nitchakan Darai <sup>3</sup>, Thanyada Rungrotmongkol <sup>4,5</sup>, Peththa Wadu Dasuni Wasana<sup>6</sup>, San Yoon Nwe <sup>1,2</sup>, Wisuwat Thongphichai <sup>1,2</sup>, Gunasekaran Suriyakala <sup>1,2</sup>, Pasarapa Towiwat <sup>7,8</sup> and Suchada Sukrong <sup>1,2\*</sup>**

<sup>1</sup> Department of Pharmacognosy and Pharmaceutical Botany, Faculty of Pharmaceutical Sciences, Chulalongkorn University, Bangkok 10330, Thailand

<sup>2</sup> Center of Excellence in DNA Barcoding of Thai Medicinal Plants, Chulalongkorn University, Bangkok 10330, Thailand

<sup>3</sup> Futuristic Science Research Center, School of Science, Walailak University, Nakhon Si Thammarat, 80160, Thailand

<sup>4</sup> Center of Excellence in Biocatalyst and Sustainable Biotechnology, Department of Biochemistry, Faculty of Science, Chulalongkorn University, Bangkok, Thailand

<sup>5</sup> Program in Bioinformatics and Computational Biology, Graduate School, Chulalongkorn University, Bangkok, Thailand

<sup>6</sup> Department of Pharmacy, Faculty of Allied Health Sciences, University of Ruhuna, Galle 80000, Sri Lanka

<sup>7</sup> Department of Pharmacology and Physiology, Faculty of Pharmaceutical Sciences, Chulalongkorn University, Bangkok 10330, Thailand

<sup>8</sup> Animal Models of Chronic Inflammation-associated Diseases for Drug Discovery Research Unit, Chulalongkorn University, Bangkok 10330, Thailand

\* Correspondence: Suchada.su@chula.ac.th, Tel.: (66)218-8363

**Table S1.** *In-Silico* ADMET Prediction of spilanthol using pkCSM

| Properties   | Model name (Unit)                                      | Result |
|--------------|--------------------------------------------------------|--------|
| Absorption   | Water solubility (log mol/L)                           | -4.374 |
|              | Caco2 permeability (log Papp in 10 <sup>-6</sup> cm/s) | 1.368  |
|              | Intestinal absorption (human) (% absorbed)             | 92.81  |
|              | Skin Permeability (log Kp)                             | -1.923 |
|              | P-glycoprotein substrate                               | No     |
|              | P-glycoprotein I inhibitor                             | No     |
|              | P-glycoprotein II inhibitor                            | No     |
| Distribution | VDss (human) (log L/kg)                                | 0.096  |
|              | BBB permeability (log BB)                              | 0.645  |
|              | CNS permeability (log PS)                              | -1.554 |
| Metabolism   | CYP2D6 substrate                                       | No     |
|              | CYP3A4 substrate                                       | No     |
|              | CYP2D6 inhibitor                                       | No     |
|              | CYP3A4 inhibitor                                       | No     |
| Excretion    | Total Clearance (log ml/min/kg)                        | 0.583  |
|              | Renal OCT2 substrate                                   | No     |

**Table S2.** Drug likeness prediction of spilanthol

| Drug Likeness      |       |       |      |        |                       |
|--------------------|-------|-------|------|--------|-----------------------|
| Lipinski           | Ghose | Veber | Egan | Muegge | Bioavailability Score |
| Yes<br>0 violation | Yes   | Yes   | Yes  | Yes    | 0.55                  |

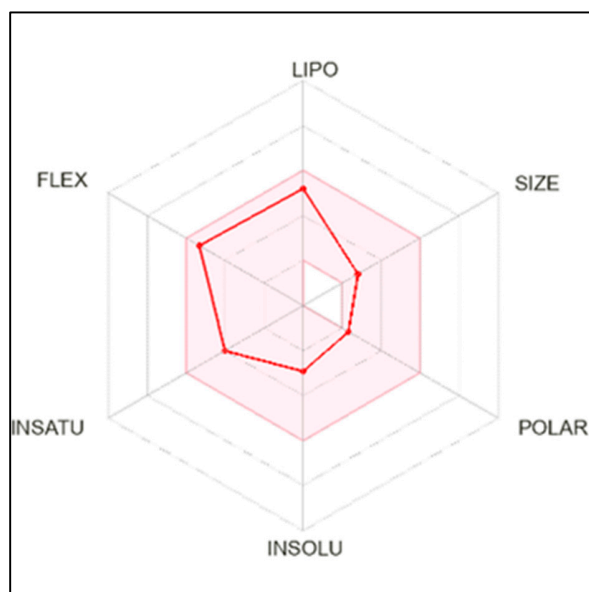

**Figure S1.** Bioavailability radar of the spilanthalol

**Table S3** *In-silico* Toxicity Prediction of Spilanthalol using protox-II

| Classification                             | Target                                           | Prediction | Probability |
|--------------------------------------------|--------------------------------------------------|------------|-------------|
| Organ Toxicity                             | Hepatotoxicity                                   | Inactive   | 0.86        |
| Toxicity endpoint                          | Carcinogenicity                                  | Inactive   | 0.61        |
|                                            | Immunotoxicity                                   | Inactive   | 0.98        |
|                                            | Mutagenicity                                     | Inactive   | 0.8         |
|                                            | Cytotoxicity                                     | Inactive   | 0.75        |
| Tox21-Nuclear receptor signalling pathways | Aryl hydrocarbon Receptor (AhR)                  | Inactive   | 0.97        |
|                                            | Androgen Receptor (AR)                           | Inactive   | 0.99        |
|                                            | Androgen Receptor Ligand Binding Domain (AR-LBD) | Inactive   | 0.99        |
|                                            | Aromatase                                        | Inactive   | 0.98        |
|                                            | Estrogen Receptor Alpha (ER)                     | Inactive   | 0.93        |
|                                            | Estrogen Receptor Ligand Binding Domain (ER-LBD) | Inactive   | 0.99        |

|                                |                                                                                       |          |      |
|--------------------------------|---------------------------------------------------------------------------------------|----------|------|
|                                | Peroxisome Proliferator Activated Receptor Gamma (PPAR-Gamma)                         | Inactive | 0.99 |
| Tox21-Stress response pathways | Nuclear factor (erythroid-derived 2)-like 2/antioxidant responsive element (nrf2/ARE) | Inactive | 0.98 |
|                                | Heat shock factor response element (HSE)                                              | Inactive | 0.98 |
|                                | Mitochondrial Membrane Potential (MMP)                                                | Inactive | 0.97 |
|                                | Phosphoprotein (Tumor Suppressor) p53                                                 | Inactive | 0.99 |
|                                | ATPase family AAA domain-containing protein 5 (ATAD5)                                 | Inactive | 0.99 |



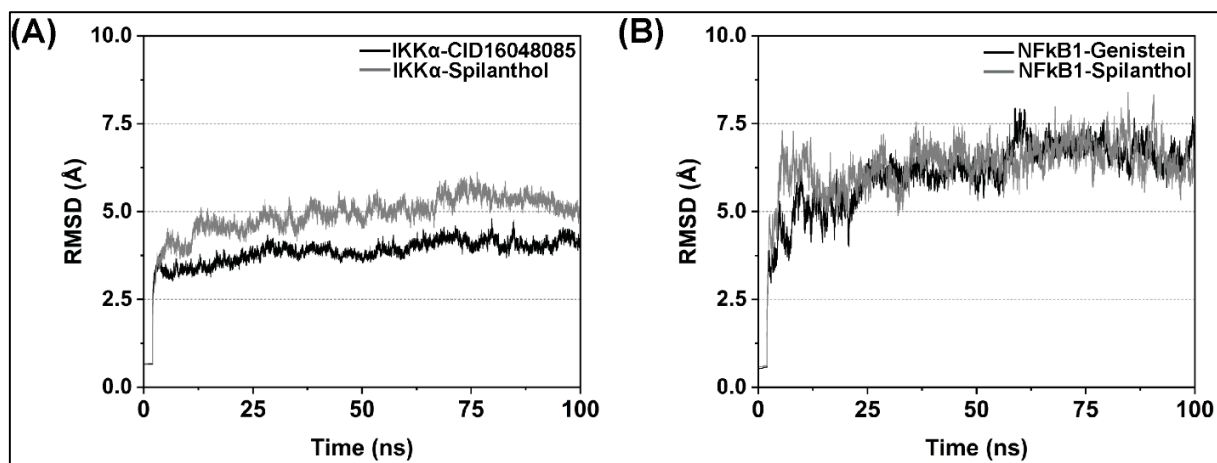

**Figure S3.** RMSD plots of all-atom residues for assessing structural stability and conformational changes in the molecular systems: IKK $\alpha$  and NFkB1

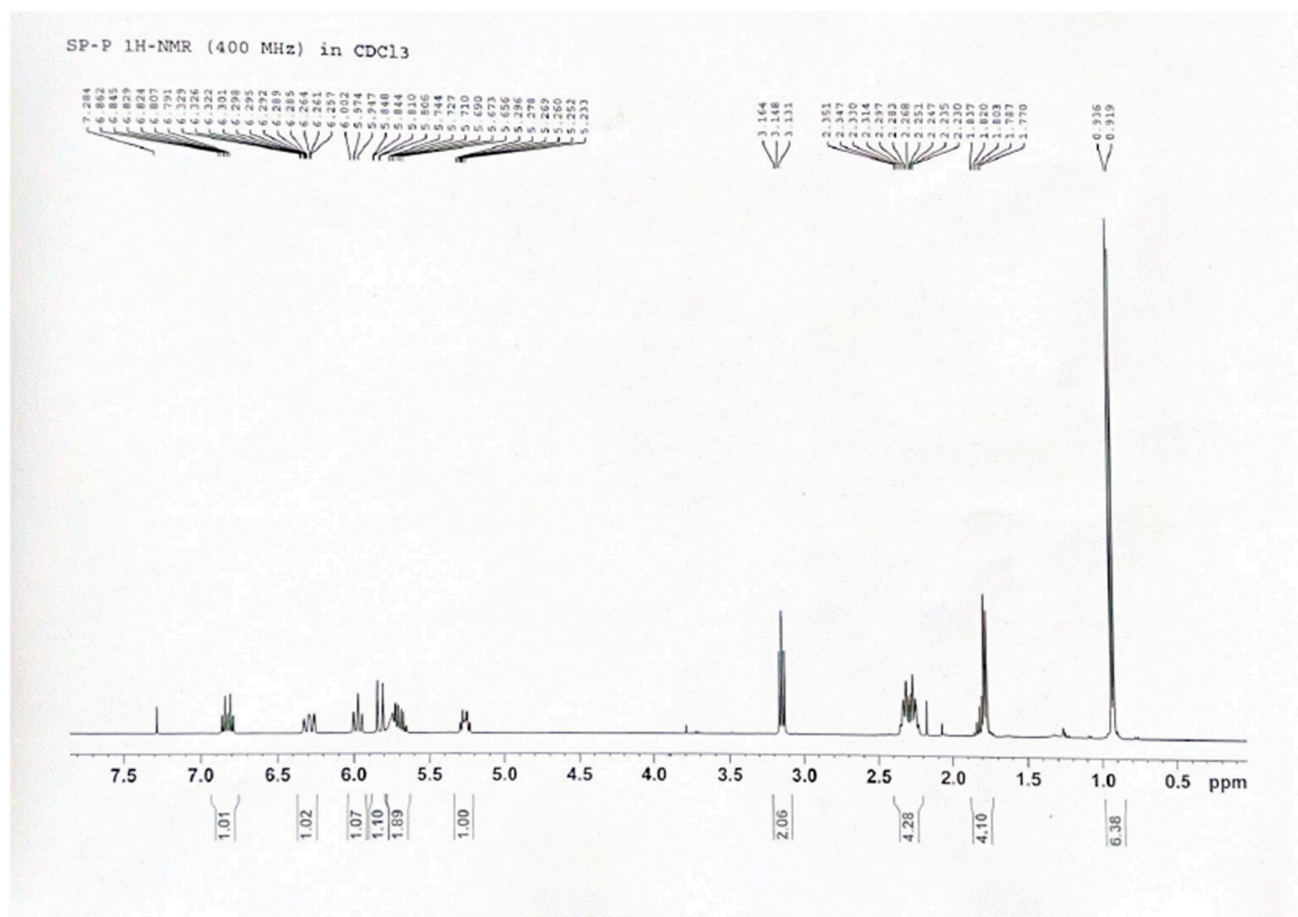

**Figure S4.**  $^1\text{H}$ -NMR (400 MHz,  $\text{CDCl}_3$ ) spectrum of spilanthol (ranging from 0.5 – 7.5)

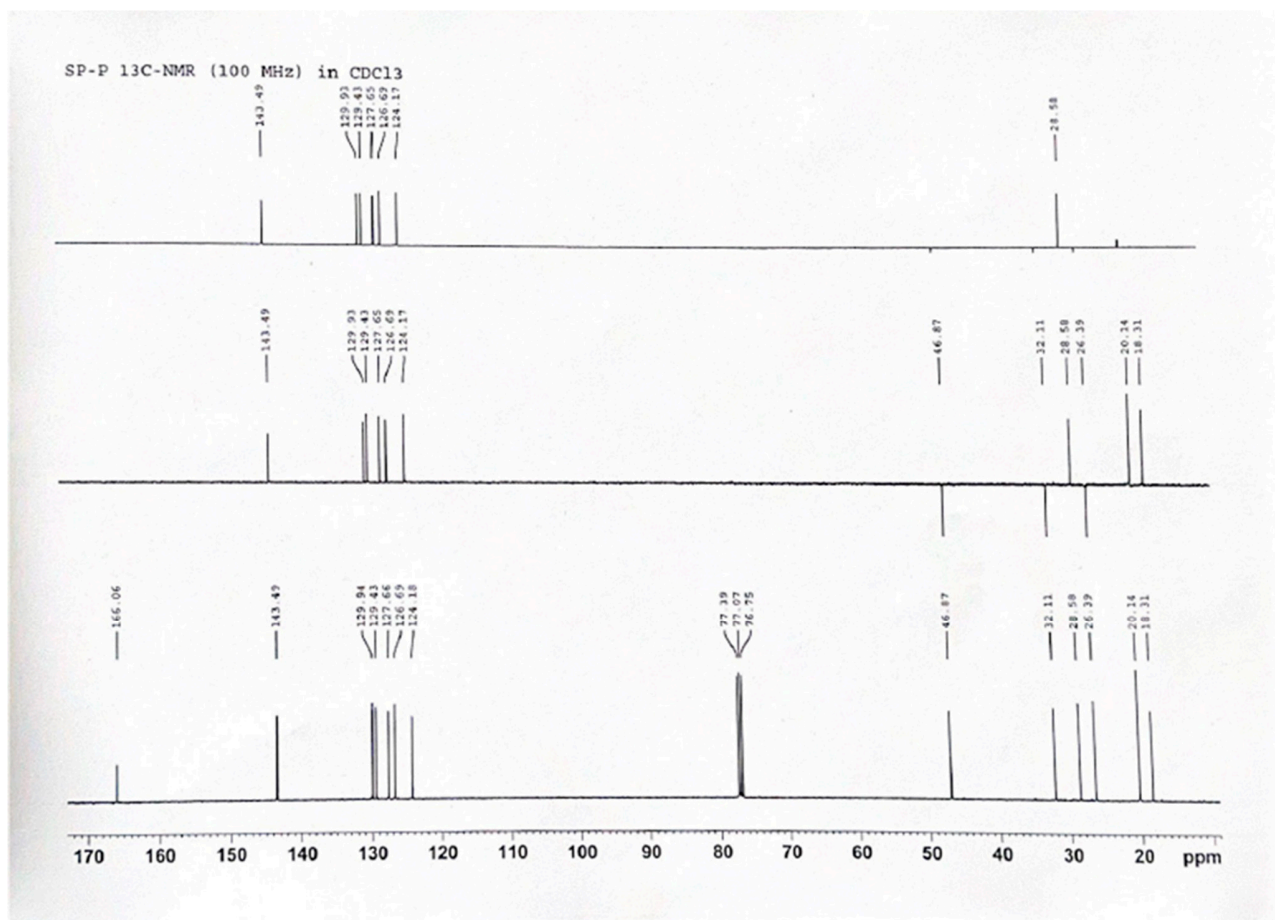

Figure S5.  $^{13}\text{C}$ -NMR (125 MHz,  $\text{CDCl}_3$ ) spectrum of spilanthol
